# Supplementary material
Source: Springer Nature journal article supplement (https://www.springermedizin.de/resource/supplementary/12890_2013_544_MOESM2_ESM.pdf/9505278)

# Arterial

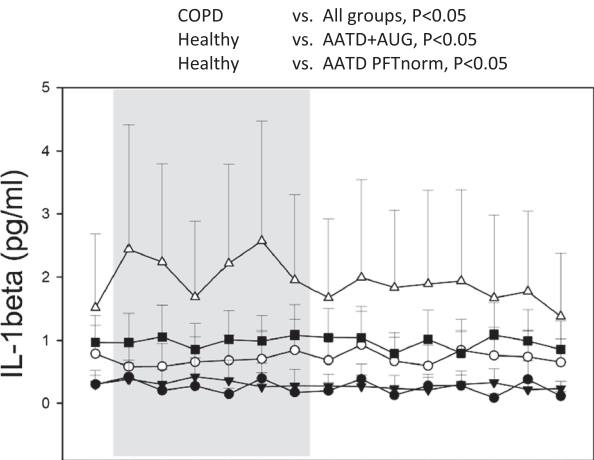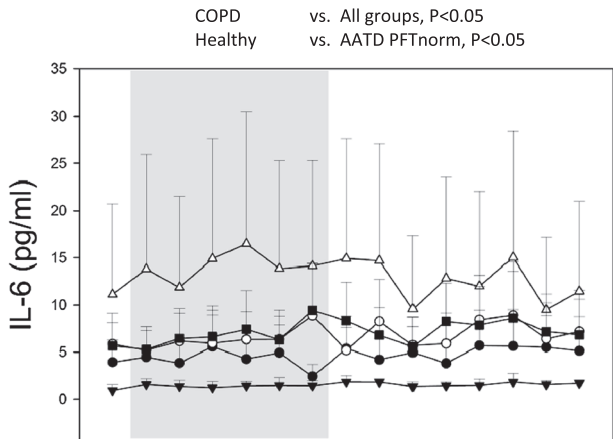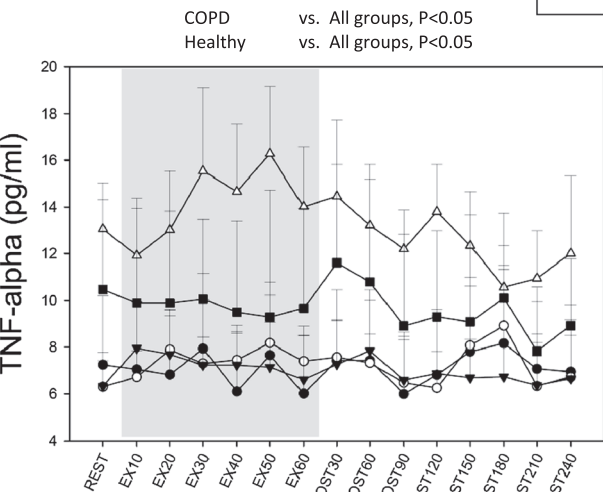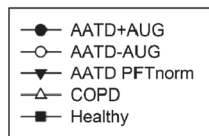

COPD vs. All groups,  $P < 0.05$   
 Healthy vs. AATD+AUG,  $P < 0.05$   
 Healthy vs. AATD-AUG,  $P < 0.05$   
 AATD PFTnorm vs. AATD+AUG,  $P < 0.05$   
 AATD PFTnorm vs. AATD-AUG,  $P < 0.05$

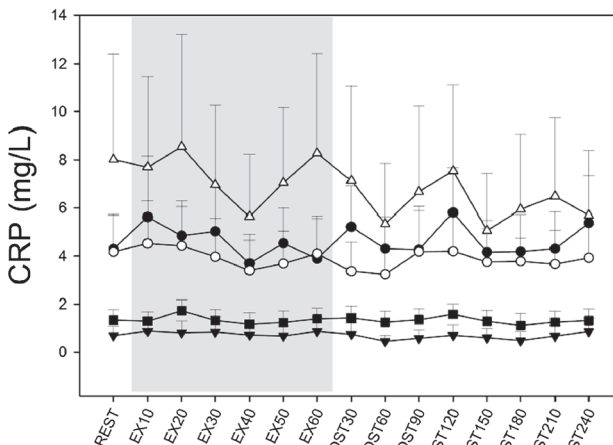

Supplement: MOESM2 [file 9505278]
